# Supplementary material for: A novel rechargeable Li–AgO battery with hybrid electrolytes
Source: Royal Society of Chemistry journal article supplement (doi:10.1039/b923706b), 2010-01-01
Supplement: b923706b.pdf [file b923706b.pdf]

## Support information

### A novel rechargeable Li-AgO battery with hybrid electrolyte

Huiqiao Li, Yonggang Wang, Ping He and Haoshen Zhou\*

*Energy Technology research Institute, National Institute of Advanced Industrial Science and Technology (AIST), Umezono, 1-1-1, Tsukuba 305-8568, Ibaraki, Japan*

#### Experimental

##### Material synthesis

AgO was prepared by a chemical oxidation method: 0.015 mol Na<sub>2</sub>S<sub>2</sub>O<sub>8</sub> and 0.030 mol NaOH were dissolved in deionized water. The mixture solution was added drop by drop to another solution contained 0.005 mol AgNO<sub>3</sub> under vigorous stirring at 60 °C. A dark suspension was obtained and kept on stirring for another 30 min at the same temperature after the addition of Na<sub>2</sub>S<sub>2</sub>O<sub>8</sub>. Then the formed precipitate was filtrated and washed by deionized water for several times. The washed precipitate was dried at 60 °C for 12 h under vacuum environment to get the final AgO sample used for further research.

##### Characterizations

The phase structure of the prepared AgO sample was analyzed using a Bruker D8 Advance X-Ray Diffractometer (XRD) with CuKα radiation. The morphology of AgO was examined using scanning electronic microscope (SEM) on a JSM-6700F instrument. Thermogravimetry-Differential thermal analysis (TG-DTA) was conducted on a MTC1000 thermal analysis system interfaced to a 2000S TG module. Samples were run in aluminum boats over a temperature range of 25~600 °C with a heating rate of 5 °C/min in a flowing atmosphere (100 ml/min) of dry nitrogen.

##### Electrochemical measurement

The cathode electrode was prepared by mixing of AgO sample, acetylene black, and polytetrafluoroethylene (PTFE) in an agate mortar in a weight ratio of 80%: 15% : 5%. The above

mixture was pressed onto a titanium grid (100 mesh) which served as the current collector. The mass load of cathode electrode was about  $5 \text{ mg/cm}^2$ ; excessive amount of Li metal was used in the anode. A rudimental Li-AgO battery with a cell structure shown below was assembled by using 1 M  $\text{LiClO}_4$  in ethyl carbonate (EC)/diethyl carbonate (DEC) (EC/DEC = 1 : 1 in volume) as the organic electrolyte for Li anode and an aqueous solution contained 1 M  $\text{LiOH}$  and 1 M  $\text{KOH}$  as the electrolyte for AgO cathode.

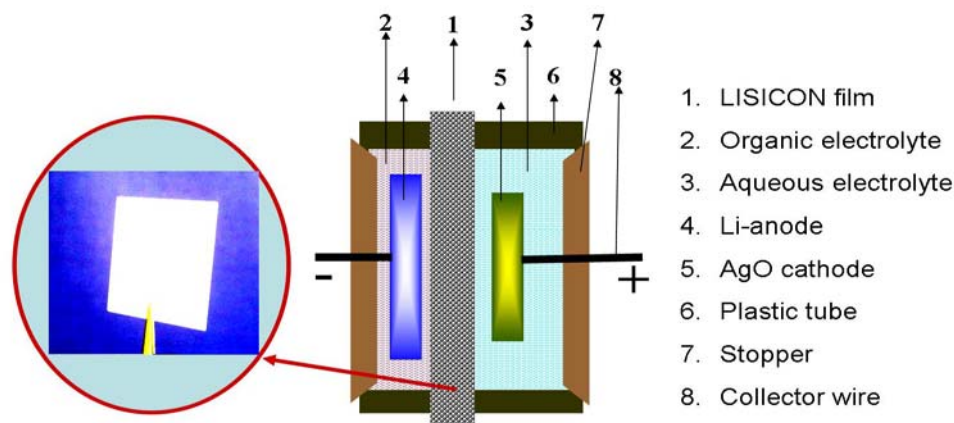

Schematic cell structure of the rudimental Li-AgO battery

The two electrolytes were separated by a water-stable superionic conductor glass ceramic film (LISICON,  $\text{Li}_{1+x+y}\text{Al}_x\text{Ti}_{2-x}\text{Si}_y\text{P}_{3-y}\text{O}_{12}$ ) with a thickness of 0.15 mm. It should be noted that only lithium ions can pass across the LISICON film during charge/discharge processes. The LISICON film was provided by Ohara Inc., Japan and its conductivity was about  $10^{-4} \text{ Scm}^{-1}$  at ambient temperature. All the electrochemical tests were performed on a Solartron Instrument Model 1287 & 1255 controlled by a computer. For galvanostatic charge/discharge tests, the cell was discharged to a voltage end of 2.7 V and charged to a constant capacity of 455 mAh/g (105% of the theoretical capacity of AgO). All the capacities were calculated based on the weight of active AgO in cathode electrode except otherwise specified.

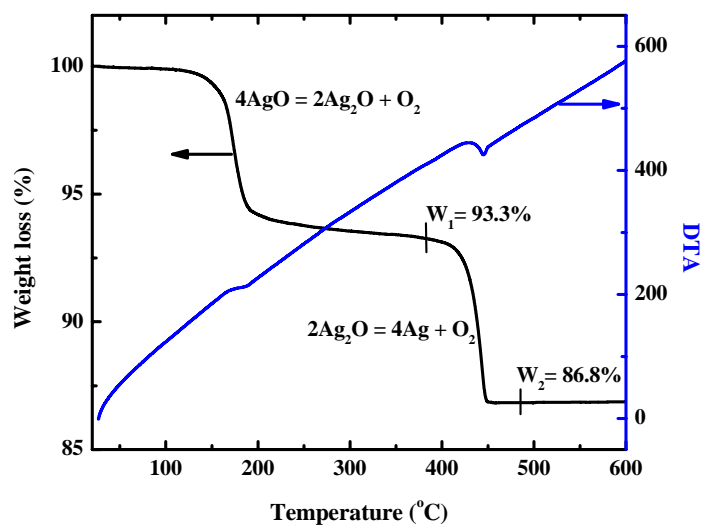

**Fig. S1** TG-DTA curves of the synthesized AgO sample in nitrogen atmosphere

The TG-DTA curve demonstrated a two-stage weight loss curve in which the first weight loss was detected in the range of 130 ~ 200 °C, which can attribute to the decomposition of AgO to Ag<sub>2</sub>O. The second weight loss was detected in the range of 400 °C ~ 450 °C, which can attribute to the decomposition of Ag<sub>2</sub>O to Ag. The occurred reactions during the TG thermal process can be described as following:

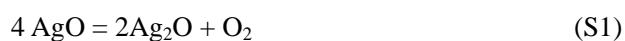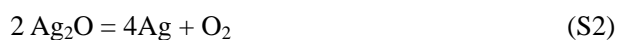

Correspondingly, the DTA curve exhibits two endothermic peaks centered at 175 °C and 444 °C, respectively. If assuming that pure AgO is tested,  $W_1$  and  $W_2$  are the remaining weight fractions after reaction (S1) and reactions (S1) + (S2), respectively. Then  $W_1$  and  $W_2$  could be calculated as 93.5% and 87.0%, respectively. According to the above TG curve, the detected  $W_1$  and  $W_2$  were 93.3% and 86.8%, very close to the theoretical values, which confirmed the high purity of the synthesized AgO sample.

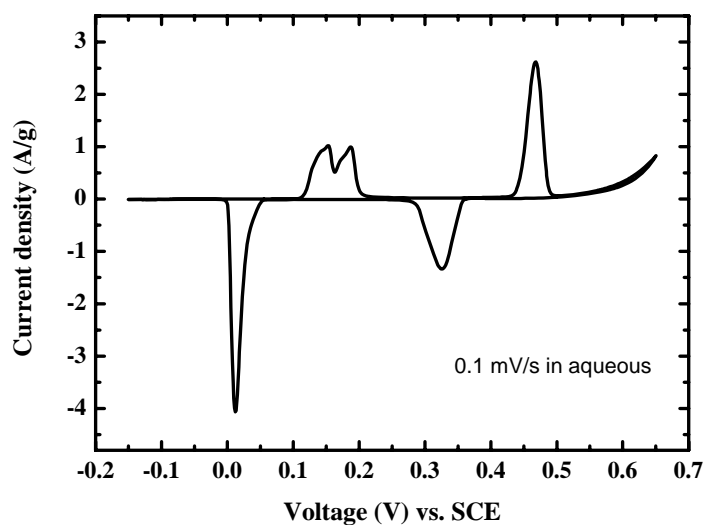

**Fig. S2** CV plot of AgO electrode at a scan rate of 0.1 mV/s in aqueous solution containing 1 M KOH and 1 M LiOH, the test was conducted using a three-electrode system in which AgO electrode served as the work electrode, SCE served as the reference electrode and Ti grid served as the counter electrode.

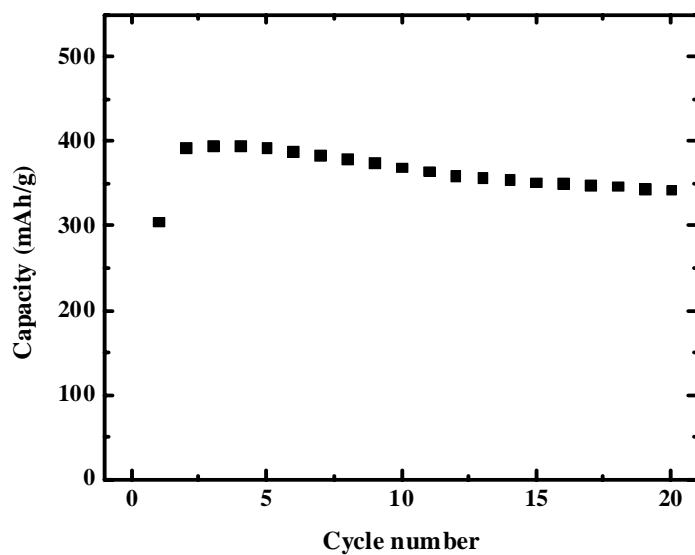

**Fig. S3** Cycle performance of the rudimental Li-AgO cell at a constant charge/discharge current of 0.5 A/g.
